# Supplementary material
Source: PubMed Central journal article supplement (PMC8562588)
Supplement: NIHMS1725852-supplement-Supplemental_Table_1.pdf [file NIHMS1725852-supplement-Supplemental_Table_1.pdf]

**Supplemental Table 1. Relationship of cotton wool spots to pertinent laboratory values by patient**

|                                                            | <b>Cotton Wool Spots<br/>(n=8)</b> | <b>No Cotton Wool Spots<br/>(n=29)</b> | <b>p-value</b> |
|------------------------------------------------------------|------------------------------------|----------------------------------------|----------------|
| <b>D-dimer, ng/mL</b>                                      | 11623.3 (11837.0)                  | 3762.3 (6436.1)                        | 0.11           |
| <b>Peak D-dimer, ng/mL</b>                                 | 29382.8 (20837.7)                  | 16380.6 (21146.4)                      | 0.15           |
| <b>Fibrinogen, ng/mL</b>                                   | 588.8 (246.8)                      | 535.5 (223.4)                          | 0.60           |
| <b>Peak fibrinogen, ng/mL</b>                              | 767.8 (117.7)                      | 729.7 (219.8)                          | 0.64           |
| <b>Platelets, 10<sup>3</sup> cells/mm<sup>3</sup></b>      | 229.8 (86.1)                       | 303.4 (144.1)                          | 0.19           |
| <b>Peak platelets, 10<sup>3</sup> cells/mm<sup>3</sup></b> | 381.8 (172.4)                      | 347.1 (166.1)                          | 0.61           |
| <b>Hematocrit, %</b>                                       | 33.6 (6.4)                         | 34.3 (7.1)                             | 0.82           |
| <b>CRP, mg/dL</b>                                          | 209.2 (146.0)                      | 123.6 (85.6)                           | <b>0.04</b>    |
| <b>Peak CRP, mg/dL</b>                                     | 353.7 (71.9)                       | 268.2 (96.0)                           | <b>0.02</b>    |
| <b>Peak IL-6, pg/mL</b>                                    | 30.7 (26.6)                        | 65.3 (124.6)                           | 0.60           |
