# Supplementary material
Source: PubMed Central journal article supplement (PMC8562588)
Supplement: NIHMS1725852-supplement-Supplemental_Table_2.pdf [file NIHMS1725852-supplement-Supplemental_Table_2.pdf]

**Supplemental Table 2. Relationship of retinal hemorrhage to pertinent laboratory values by patient**

|                                                            | <b>Retinal hemorrhage<br/>(n=7)</b> | <b>No retinal hemorrhage<br/>(n=30)</b> | <b>p-value</b> |
|------------------------------------------------------------|-------------------------------------|-----------------------------------------|----------------|
| <b>D-dimer, ng/mL</b>                                      | 9339.7 (11979.7)                    | 4584.0 (7307)                           | 0.18           |
| <b>Peak D-dimer, ng/mL</b>                                 | 33799.0 (27075.8)                   | 15263.0 (18833.9)                       | <b>0.05</b>    |
| <b>Fibrinogen, ng/mL</b>                                   | 599.3 (300.2)                       | 537.4 (210.2)                           | 0.56           |
| <b>Peak fibrinogen, ng/mL</b>                              | 768.1 (220.6)                       | 731.0 (197.4)                           | 0.69           |
| <b>Platelets, 10<sup>3</sup> cells/mm<sup>3</sup></b>      | 212.5 (136.5)                       | 301.7 (130.6)                           | 0.19           |
| <b>Peak platelets, 10<sup>3</sup> cells/mm<sup>3</sup></b> | 409.4 (84.6)                        | 341.7 (178.4)                           | 0.16           |
| <b>Hematocrit, %</b>                                       | 32.9 (6.1)                          | 34.4 (7.1)                              | 0.66           |
| <b>CRP, mg/dL</b>                                          | 228.0 (140.0)                       | 122.0 (86.9)                            | 0.10           |
| <b>Peak CRP, mg/dL</b>                                     | 297.8 (108.1)                       | 284.1 (96.3)                            | 0.74           |
| <b>Peak IL-6, pg/mL</b>                                    | 130.6 (225.6)                       | 40.3 (63.3)                             | 0.48           |
