# Supplementary material
Source: PubMed Central journal article supplement (PMC8562588)
Supplement: NIHMS1725852-supplement-Supplemental_Table_3.pdf [file NIHMS1725852-supplement-Supplemental_Table_3.pdf]

**Supplemental Table 3. Multivariate logistic regression analysis for retinopathy**

|                                       |             | Univariate Model |        |      |         | Multivariate Model  |        |      |         |
|---------------------------------------|-------------|------------------|--------|------|---------|---------------------|--------|------|---------|
|                                       | Units       | Odds Ratio       | 95% CI |      | p-value | Adjusted Odds Ratio | 95% CI |      | p-value |
| <b>Peak D-dimer, ng/mL</b>            | <b>5000</b> | 1.28             | 1.05   | 1.57 | 0.02    | 1.32                | 1.01   | 1.73 | 0.04    |
| <b>Peak CRP, mg/dL</b>                | <b>50</b>   | 1.29             | 0.90   | 1.86 | 0.17    | 0.70                | 0.39   | 1.28 | 0.25    |
| <b>SOFA (24-48 hours of eye exam)</b> | <b>1</b>    | 1.25             | 1.00   | 1.55 | 0.048   | 1.12                | 0.86   | 1.45 | 0.40    |
| <b>Male sex</b>                       |             | 8.10             | 1.74   | 37.8 | 0.0077  | 9.61                | 1.22   | 75.5 | 0.03    |
